# Supplementary material for: Engineering osteoclast resorption units via sacrificial microgels in a bone-on-chip platform
Source: Royal Society of Chemistry journal article supplement (doi:10.1039/d5lc00682a), 2025-11-11
Supplement: d5lc00682a3.pdf [file d5lc00682a3.pdf]

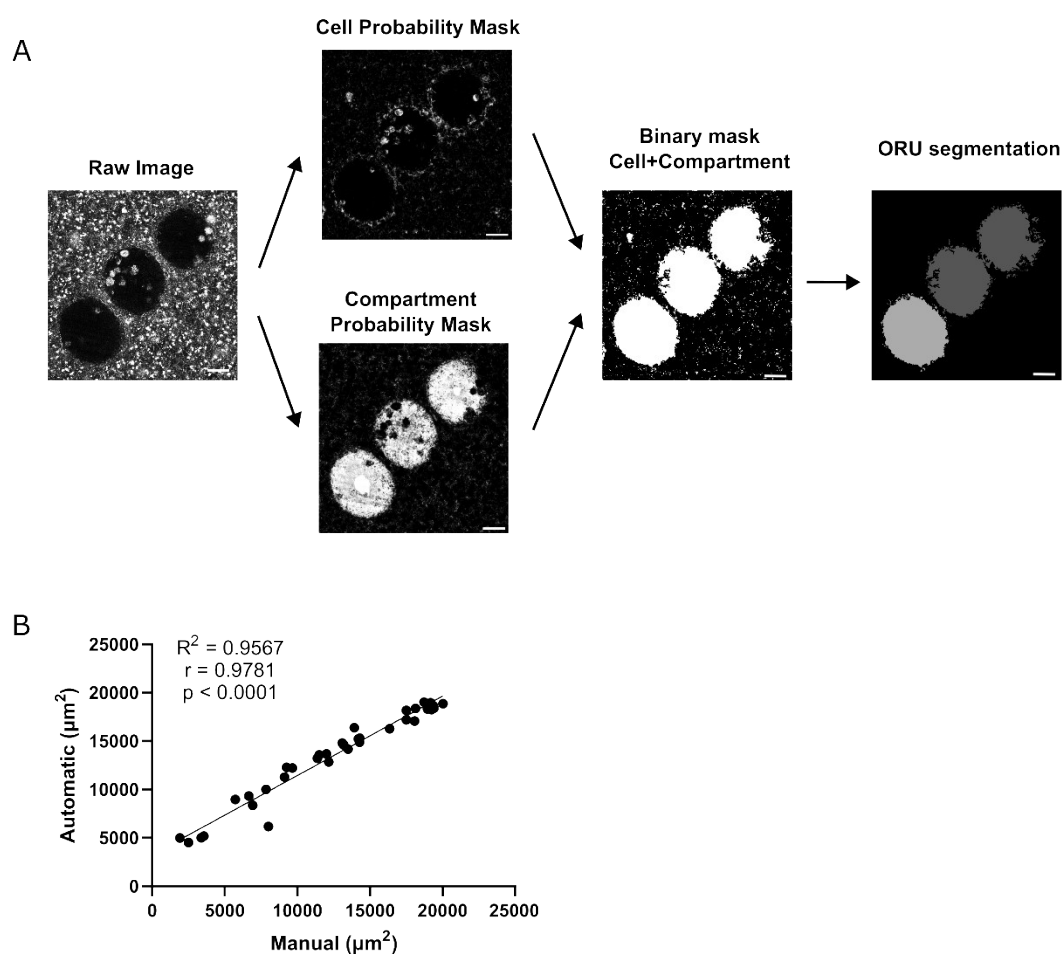

**Figure S1.** Automatic segmentation of ORU using an Ilastik pixel classification algorithm. A) Workflow of ORU segmentation. The pixels in raw images are classified using machine learning and probability masks are generated for the ORU compartment and osteoclasts. In FIJI, binary masks are obtained for both components and added to obtain the binary mask for the whole ORU, followed by segmentation and volume measurement. Scale bar - 50 $\mu\text{m}$ . B) Linear regression of ORU volume obtained through manual and automatic segmentation.
